# Supplementary material for: eDNA metabarcoding-based source attribution of fecal indicator bacteria exceedances in urban freshwater beaches, sand and rivers
Source: Royal Society of Chemistry journal article supplement (doi:10.1039/d4va00221k), 2025-01-01
Supplement: d4va00221k1.pdf [file d4va00221k1.pdf]

### Supplementary Data

Saleem et al. 2024. eDNA Metabarcoding-based Source Attribution of Fecal Indicator Bacteria Exceedances in Urban Freshwater Beaches, Sand and Rivers.

#### Supplementary dPCR method information

Sequences of dPCR primers and probes are shown below. Primer oligos (250 nM) were manufactured by Integrated Technologies Incorporated. Probes (6000 pM) were manufactured by Life Technologies Inc. dPCR reactions were run in singleton format as previous analyses have shown high concordance between sample dPCR replicates (Edge et al. 2021). The mean number of qualified wells for dPCR assays was 17,466 (HF183/Gull4), 17,951 (HuMt/GooseMt) 17,808 (Dog3), 17,925 (Rum2Bac), and 17,627 (Pig2Bac).

| <u>dPCR Oligonucleotide</u>                                                             | <u>Sequence</u>                                                                              |
|-----------------------------------------------------------------------------------------|----------------------------------------------------------------------------------------------|
| Human HF183<br>F primer HF183<br>R primer BacR287<br>Probe BacP234MGB                   | ATCATGAGTTCACATGTCCG<br>CTTCCTCTCAGAACCCCTATCC<br>FAM-CTAATGGAACGCATCCC-MGB                  |
| Gull4<br>F primer qGull7F<br>R primer qGull8R<br>Probe qGull7Pb                         | CTTGCATCGACCTAAAGTTTTGAG<br>GGTTCTCTGTATTATGCGGTATTAGCA<br>VIC-ACACGTGGGTAACCTGCCCATCAGA-QSY |
| Dog3<br>F primer DG3F<br>R primer DG3R<br>Probe DG3                                     | TTTTCAGCCCCGTTGTTTCG<br>TGAGCGGGCATGGTCATATT<br>FAM-AGTCTACGCGGGCGTACT-MGB                   |
| Ruminant Rum2Bac<br>F primer BacB2-590F<br>R primer Bac708Rm<br>Probe BacB2-626P        | ACAGCCCGCGATTGATACTGGTAA<br>CAATCGGAGTTCCTTCGTGAT<br>VIC-ATGAGGTGGATGGAATTCGTGGTGT-QSY       |
| Pig Pig2Bac<br>F primer Pig2Bac41F<br>R primer Pig2Bac163Rm<br>Probe Pig2Bac113MGB      | GCATGAATTTAGCTTGCTAAATTTGAT<br>ACCTCATAACGGTATTAATCCGC<br>FAM-TCCACGGGATAGCC-MGBNFQ          |
| Human mitochondrial<br>F primer HumMtF<br>R primer HumMtR<br>Probe HumMtPr              | CAGCAGCCATTCAAGCAATGC<br>GGTGGAGACCTAATTGGGCTGATTAG<br>VIC - TATCGGCGATATCGGTTTCATCCTCG-QSY  |
| Canada Goose mitochondrial<br>F primer GooseMtF<br>R primer GooseMtR<br>Probe GooseMtPr | CTAACATCCAAATCCCTCGACCCA<br>TCCTATTCAGCCTCCTAGTGCTCT<br>FAM-TACTCACCGCCATAGCCCTAGCCT-QSY     |

Supplementary Table 1. Description of the 48 samples processed for digital PCR and eDNA metabarcoding.

| <b>Sample Name</b>   | <b>Sample Description</b>              | <b>Sample Type</b> | <b>Sampling Location</b> |
|----------------------|----------------------------------------|--------------------|--------------------------|
| MC-Ex-June10         | Marie Curtis BAV Exceedance Day        | Beach Water        | Toronto                  |
| MC-Ex-June30         | Marie Curtis BAV Exceedance Day        | Beach Water        | Toronto                  |
| MC-Ex-July7          | Marie Curtis BAV Exceedance Day        | Beach Water        | Toronto                  |
| MC-Non-ex-June2      | Marie Curtis BAV Non-Exceedance Day    | Beach Water        | Toronto                  |
| MC-Non-ex-July19     | Marie Curtis BAV Non-Exceedance Day    | Beach Water        | Toronto                  |
| MC-Non-ex-August25   | Marie Curtis BAV Non-Exceedance Day    | Beach Water        | Toronto                  |
| SS-Ex-June29         | Sunnyside BAV Exceedance Day           | Beach Water        | Toronto                  |
| SS-Ex-June30         | Sunnyside BAV Exceedance Day           | Beach Water        | Toronto                  |
| SS-Ex-August25       | Sunnyside BAV Exceedance Day           | Beach Water        | Toronto                  |
| SS-Non-ex-June2      | Sunnyside BAV Non-Exceedance Day       | Beach Water        | Toronto                  |
| SS-Non-ex-July7      | Sunnyside BAV Non-Exceedance Day       | Beach Water        | Toronto                  |
| SS-Non-ex-August5    | Sunnyside BAV Non-Exceedance Day       | Beach Water        | Toronto                  |
| Hum-Ex-June29        | Humber River BAV Exceedance Day        | Source Water       | Toronto                  |
| Hum-Ex-June30        | Humber River BAV Exceedance Day        | Source Water       | Toronto                  |
| Hum-Ex-August25      | Humber River BAV Exceedance Day        | Source Water       | Toronto                  |
| Hum-Non-ex-June2     | Humber River BAV Non-Exceedance Day    | Source Water       | Toronto                  |
| Hum-Non-ex-July7     | Humber River BAV Non-Exceedance Day    | Source Water       | Toronto                  |
| Hum-Non-ex-August5   | Humber River BAV Non-Exceedance Day    | Source Water       | Toronto                  |
| ETOB-Ex-June10       | Etobicoke Creek BAV Exceedance Day     | Source Water       | Toronto                  |
| ETOB-Ex-June30       | Etobicoke Creek BAV Exceedance Day     | Source Water       | Toronto                  |
| ETOB-Ex-July7        | Etobicoke Creek BAV Exceedance Day     | Source Water       | Toronto                  |
| ETOB-Non-ex-June2    | Etobicoke Creek BAV Non-Exceedance Day | Source Water       | Toronto                  |
| ETOB-Non-ex-July28   | Etobicoke Creek BAV Non-Exceedance Day | Source Water       | Toronto                  |
| ETOB-Non-ex-August26 | Etobicoke Creek BAV Non-Exceedance Day | Source Water       | Toronto                  |
| LK-Ex-August4        | Lakeside Beach BAV Exceedance Day      | Beach Water        | Niagara                  |
| LK-Ex-August9        | Lakeside Beach BAV Exceedance Day      | Beach Water        | Niagara                  |
| Sun-Ex-August11      | Sunset Beach BAV Exceedance Day        | Beach Water        | Niagara                  |
| LK-Non-ex-August10   | Lakeside Beach BAV Non-Exceedance Day  | Beach Water        | Niagara                  |
| LK-Non-ex-August17   | Lakeside Beach BAV Non-Exceedance Day  | Beach Water        | Niagara                  |
| Sun-Non-ex-August30  | Sunset Beach BAV Non-Exceedance Day    | Beach Water        | Niagara                  |
| Sun-Ex-June7         | Sunset Beach BAV Exceedance Day        | Beach Water        | Niagara                  |
| Sun-Ex-July21        | Sunset Beach BAV Exceedance Day        | Beach Water        | Niagara                  |
| Sun-Ex-August9       | Sunset Beach BAV Exceedance Day        | Beach Water        | Niagara                  |
| Sun-Non-Ex-June8     | Sunset Beach BAV Non-Exceedance Day    | Beach Water        | Niagara                  |

|                          |                                     |                          |         |
|--------------------------|-------------------------------------|--------------------------|---------|
| Sun-Non-Ex-July27        | Sunset Beach BAV Non-Exceedance Day | Beach Water              | Niagara |
| Sun-Non-Ex-August25      | Sunset Beach BAV Non-Exceedance Day | Beach Water              | Niagara |
| LK-Sand-Ex-June23        | Lakeside Sand                       | Shoreline Sand-porewater | Niagara |
| LK-Sand-Ex-August4       | Lakeside Sand                       | Shoreline Sand-porewater | Niagara |
| LK-Sand-Ex-August10      | Lakeside Sand                       | Shoreline Sand-porewater | Niagara |
| LK-Sand-June22           | Lakeside Sand                       | Shoreline Sand-porewater | Niagara |
| LK-Sand-July8            | Lakeside Sand                       | Shoreline Sand-porewater | Niagara |
| LK-Sand-August17         | Lakeside Sand                       | Shoreline Sand-porewater | Niagara |
| Sun-Sand-Ex-June7        | Sunset Sand                         | Shoreline Sand-porewater | Niagara |
| Sun-Sand-Ex-July21       | Sunset Sand                         | Shoreline Sand-porewater | Niagara |
| Sun-Sand-Ex-August9      | Sunset Sand                         | Shoreline Sand-porewater | Niagara |
| Sun-Sand-Non-Ex-June1    | Sunset Sand                         | Shoreline Sand-porewater | Niagara |
| Sun-Sand-Non-Ex-July27   | Sunset Sand                         | Shoreline Sand-porewater | Niagara |
| Sun-Sand-Non-Ex-August16 | Sunset Sand                         | Shoreline Sand-porewater | Niagara |

Supplementary Table 2. Quality control analytics before and after each eDNA analysis pipeline filtration step (n = 48).

| <b>Data Quality Step</b>              | <b>Process Summary</b> |              |
|---------------------------------------|------------------------|--------------|
| <b>Paired-end Merging</b>             | Before Merging         | 222805 ± 224 |
|                                       | After Merging          | 219605 ± 222 |
| <b>Trimming</b>                       | Before Trimming        | 219605 ± 222 |
|                                       | After Trimming         | 219551 ± 224 |
| <b>Quality Filtering</b>              | Processed Sequences    | 219551 ± 224 |
|                                       | Passed Sequences       | 215993 ± 222 |
| <b>Dereplication</b>                  | Processed Sequences    | 215993 ± 222 |
|                                       | Unique Sequences       | 40653 ± 732  |
| <b>Exact Sequence Variants (ESVs)</b> | Before Filtration      | 369          |
|                                       | After Filtration       | 200          |

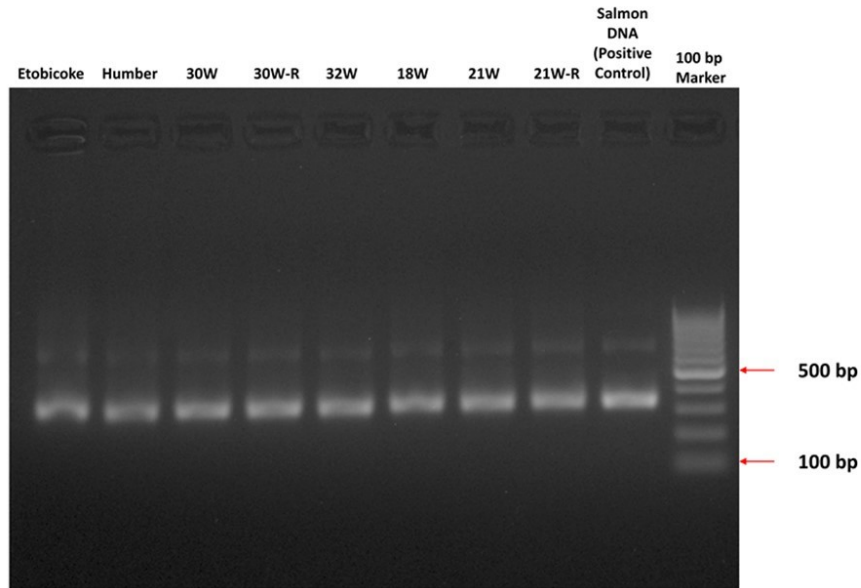

Supplementary Figure 1. Amplicon PCR for mitochondrial 16S rRNA gene.

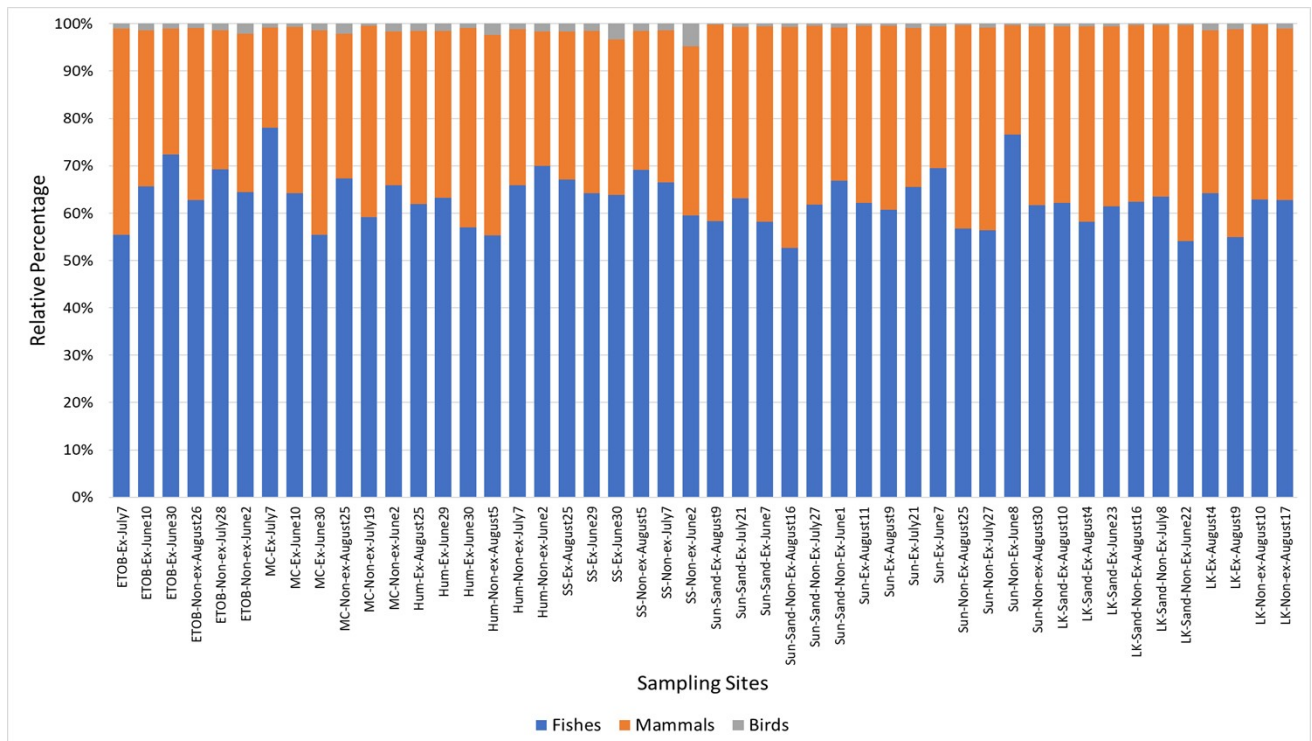

Supplementary Figure 2. Relative abundance of Exact Sequence Variants associated with Fishes, Mammals and Birds in all samples (n = 48).

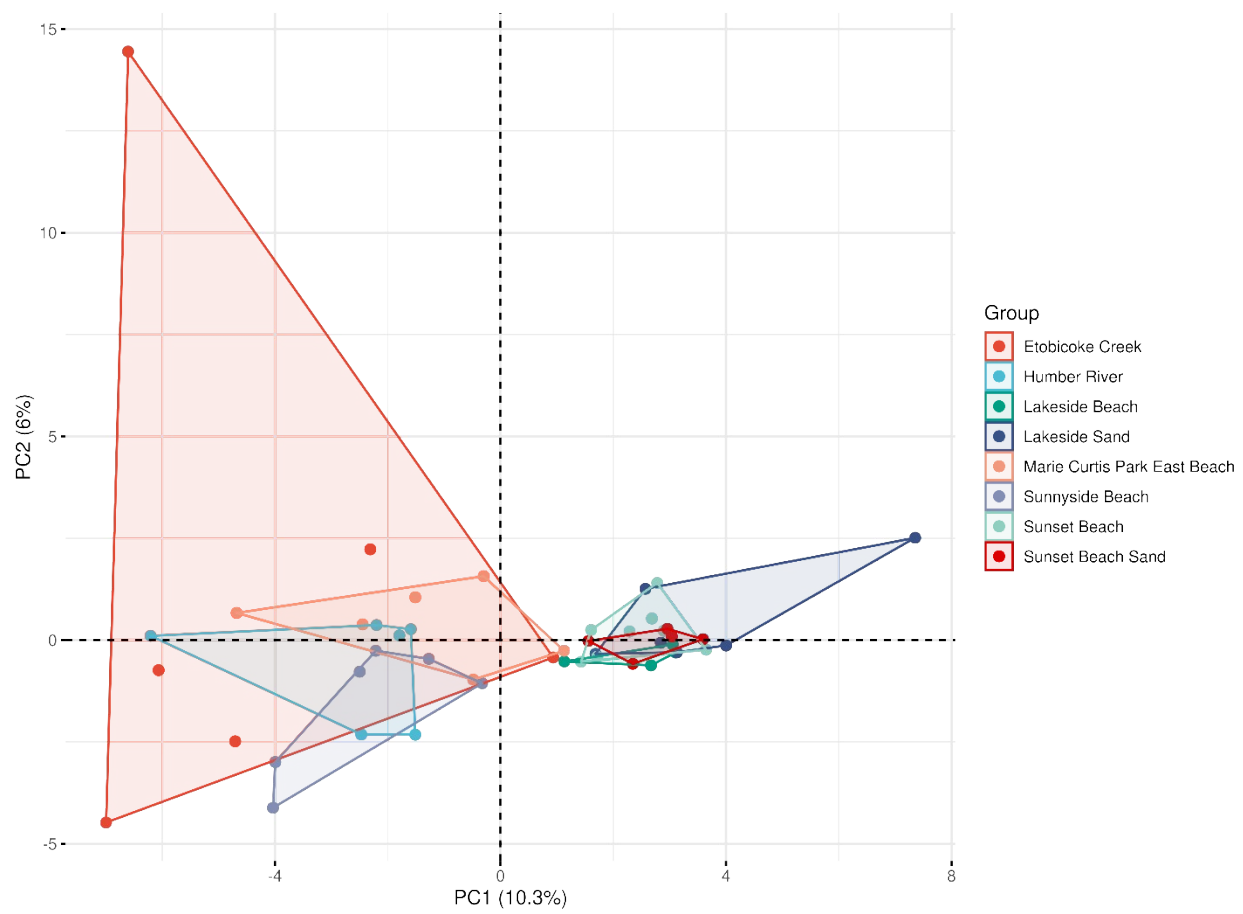

Supplementary Figure 3. Principle Component Analysis (Beta Diversity) of Fish species for Toronto and Niagara beaches, rivers and sand samples.

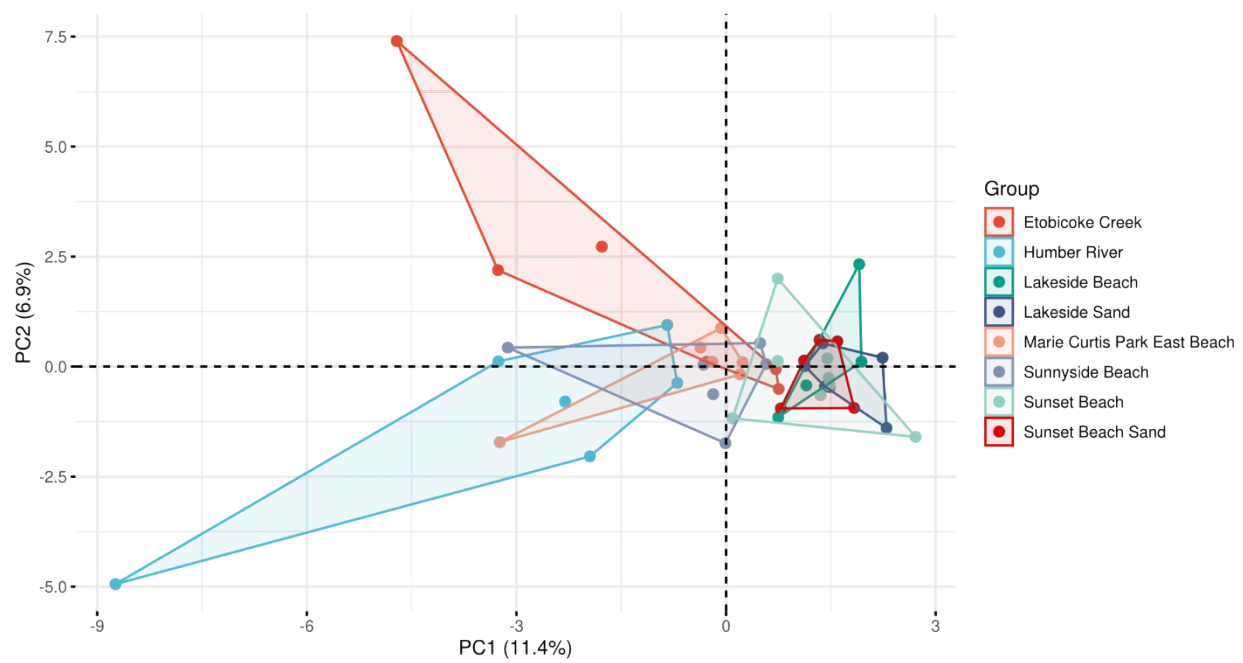

Supplementary Figure 4. Principle Component Analysis (Beta Diversity) of Mammal species for Toronto and Niagara beaches, rivers and sand samples.

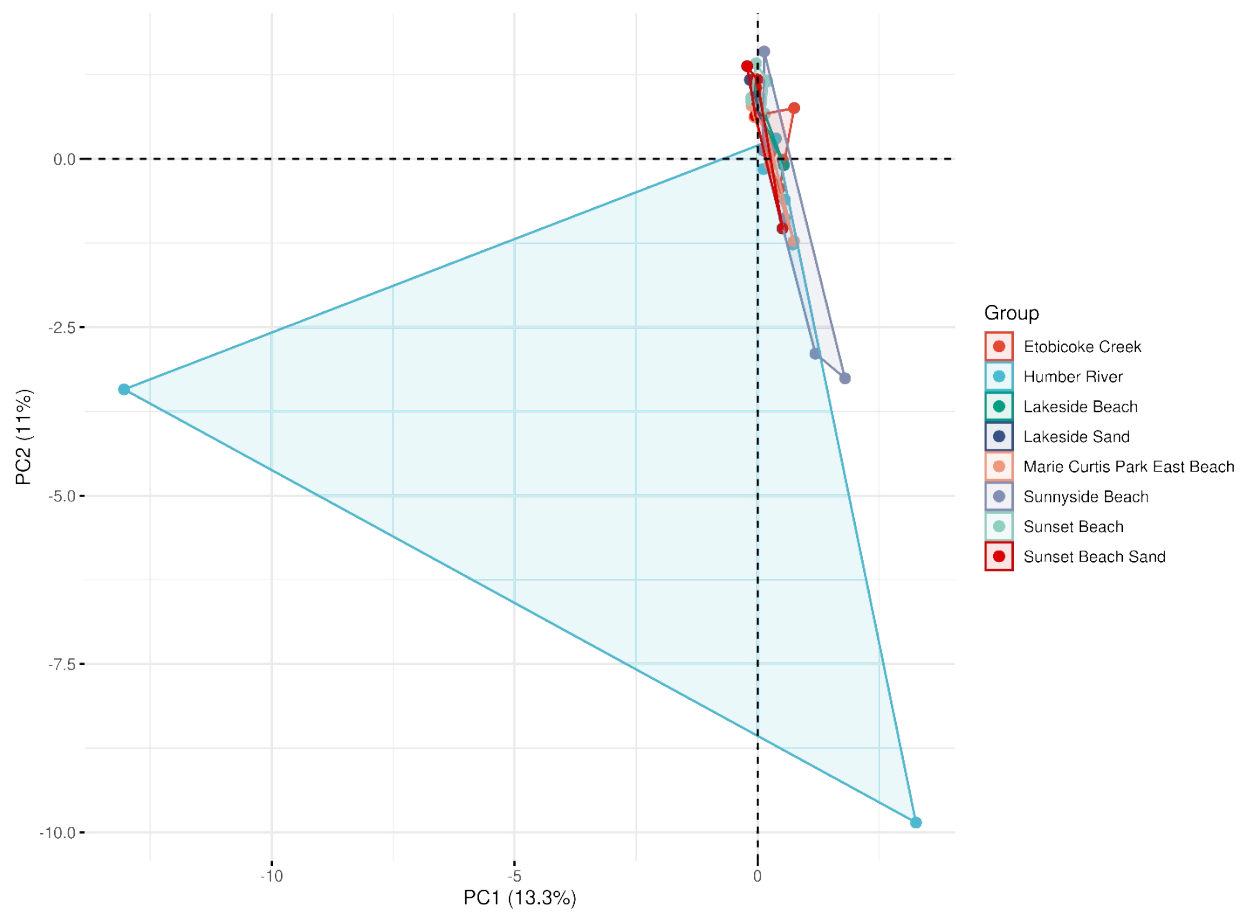

Supplementary Figure 5. Principle Component Analysis (Beta Diversity) of Bird species for Toronto and Niagara beaches, rivers and sand samples.



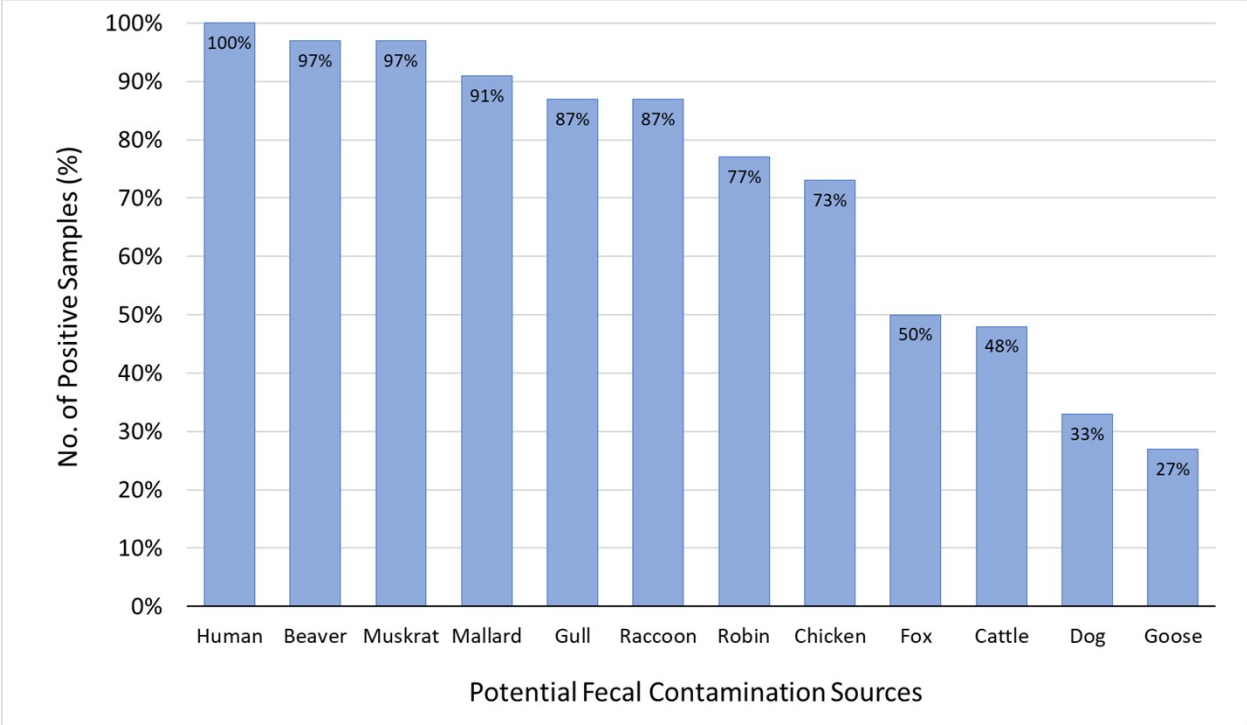

Supplementary Figure 6. Detection percentage (Number of positive samples) of common fecal contamination sources in the beach, river, and sand samples (n = 48).

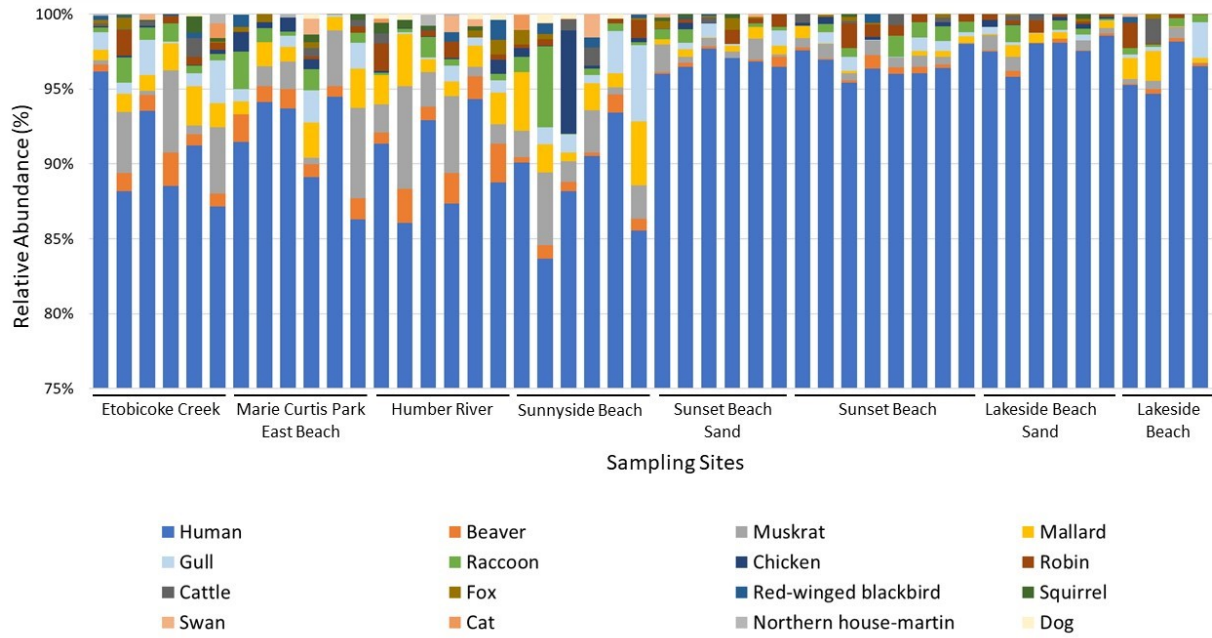

Supplementary Figure 7. Relative abundance of potential mammalian and bird fecal contamination sources for beaches, rivers and sand samples.

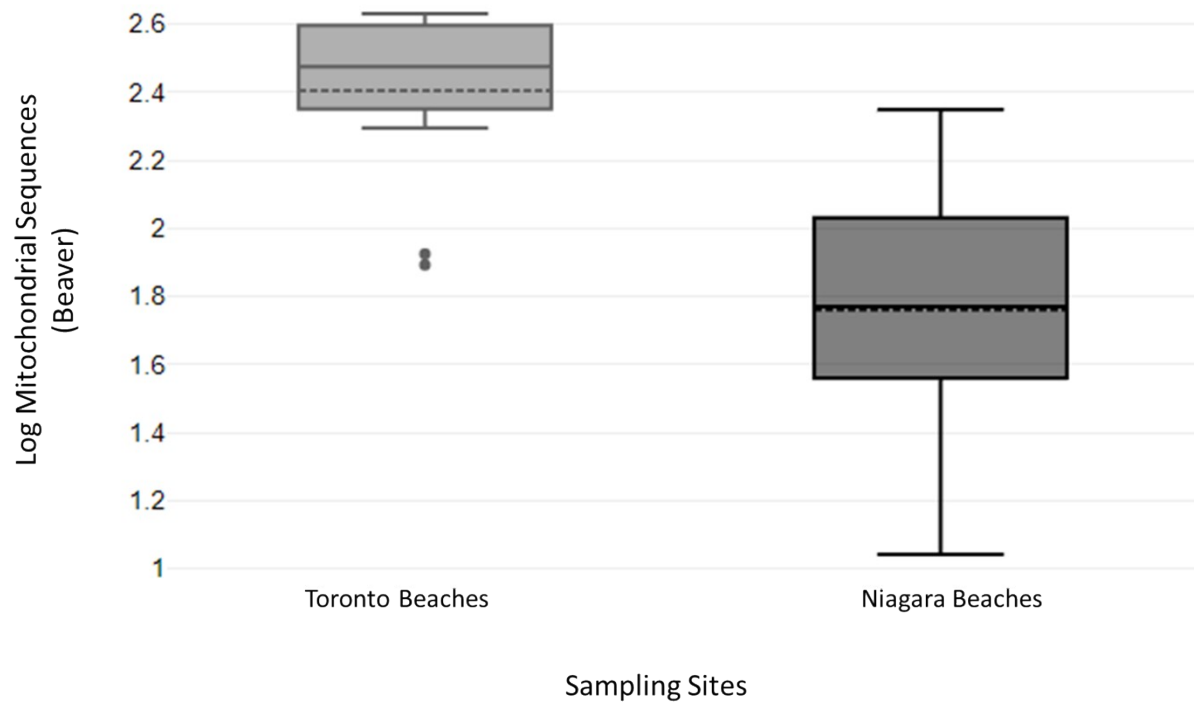

Supplementary Figure 8. Comparative abundance of Beaver mitochondrial sequences between Toronto and Niagara beaches.

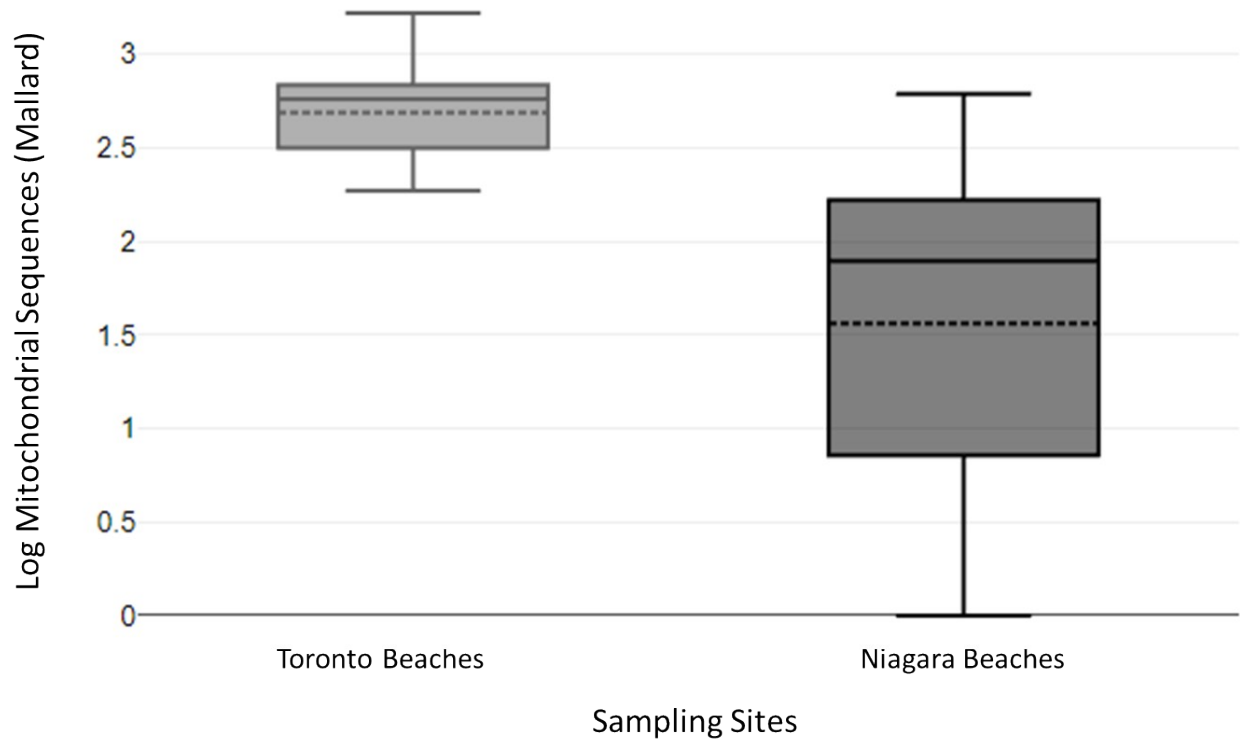

Supplementary Figure 9. Comparative abundance of Mallard mitochondrial sequences between Toronto and Niagara beaches.

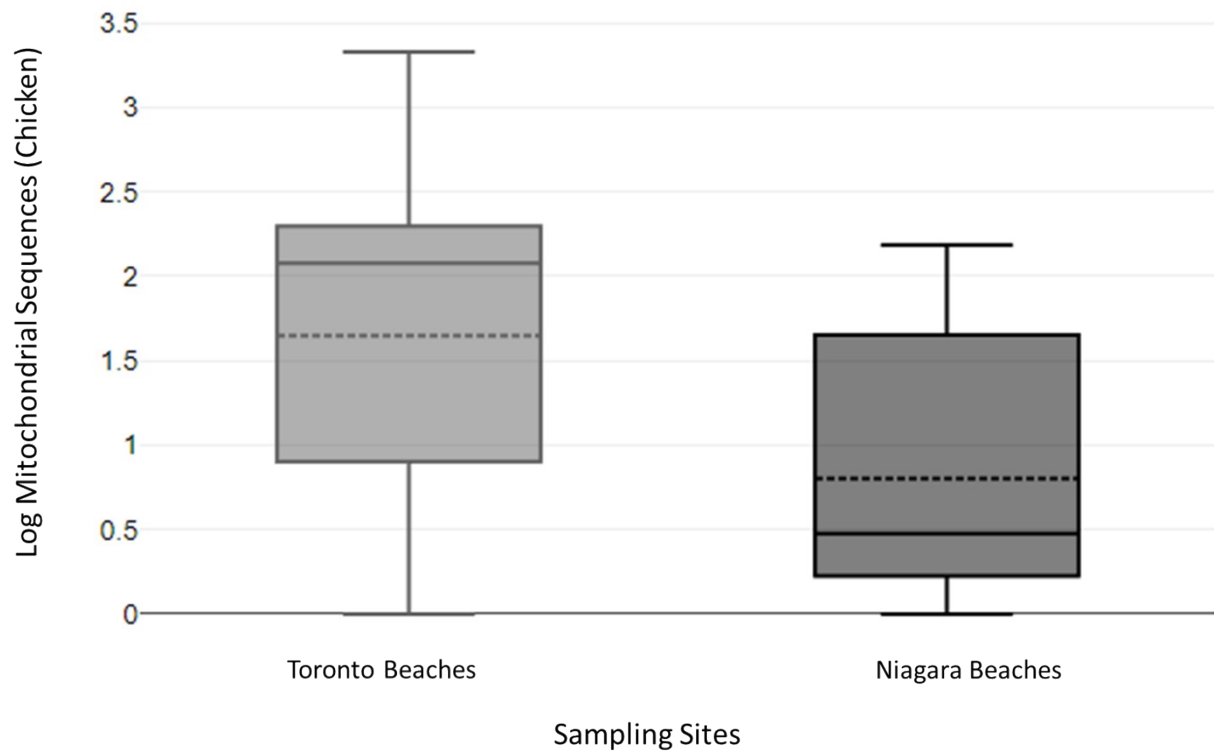

Supplementary Figure 10. Comparative abundance of Chicken mitochondrial sequences between Toronto and Niagara beaches.

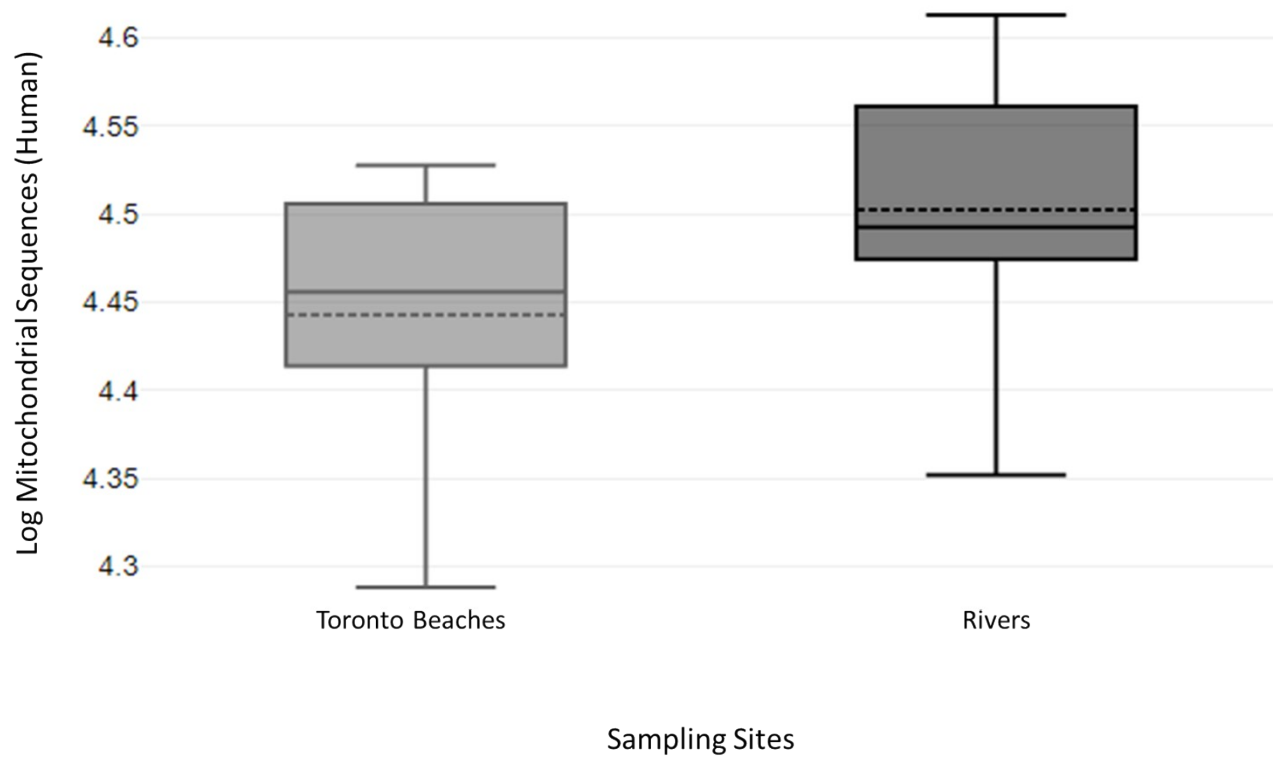

Supplementary Figure 11. Comparative abundance of Human mitochondrial sequences between Toronto beaches and river samples.

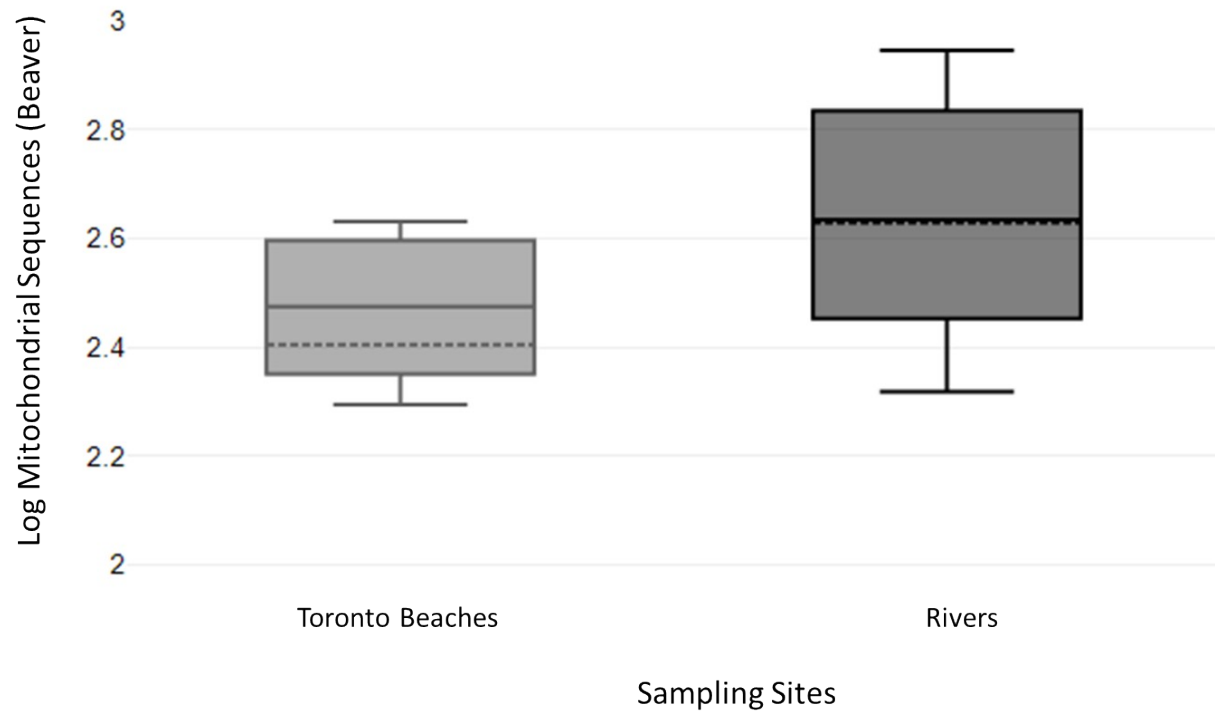

Supplementary Figure 12. Comparative abundance of Beaver mitochondrial sequences between Toronto beaches and river samples.

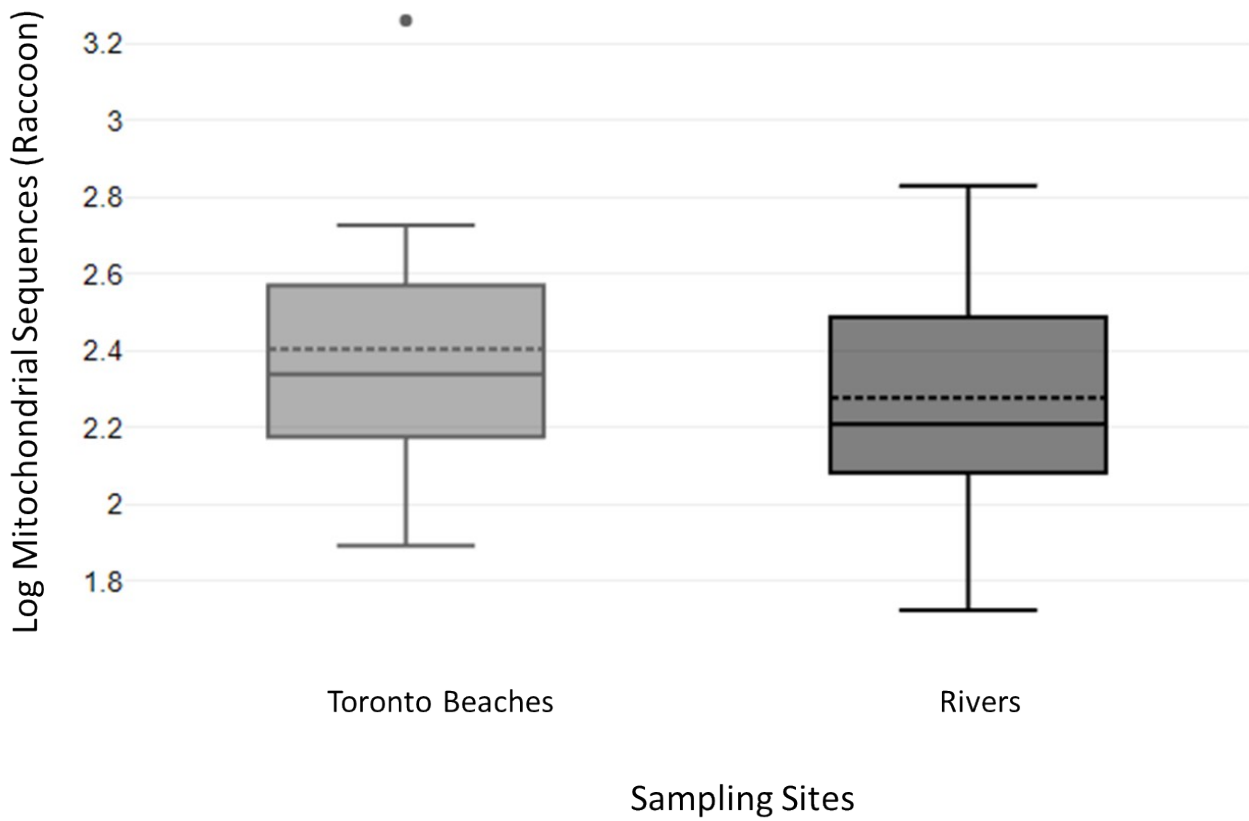

Supplementary Figure 13. Comparative abundance of Raccoon mitochondrial sequences between Toronto beaches and river samples.



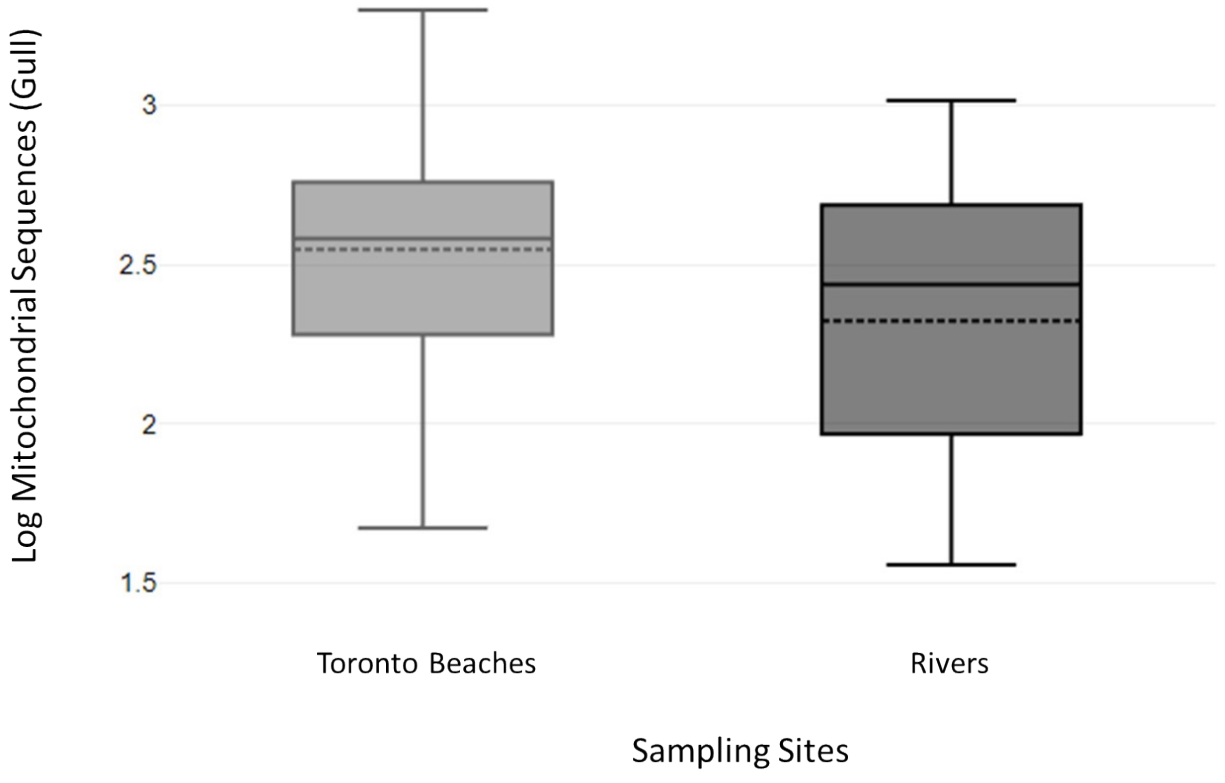

Supplementary Figure 14. Comparative abundance of Gull mitochondrial sequences between Toronto beaches and river samples.

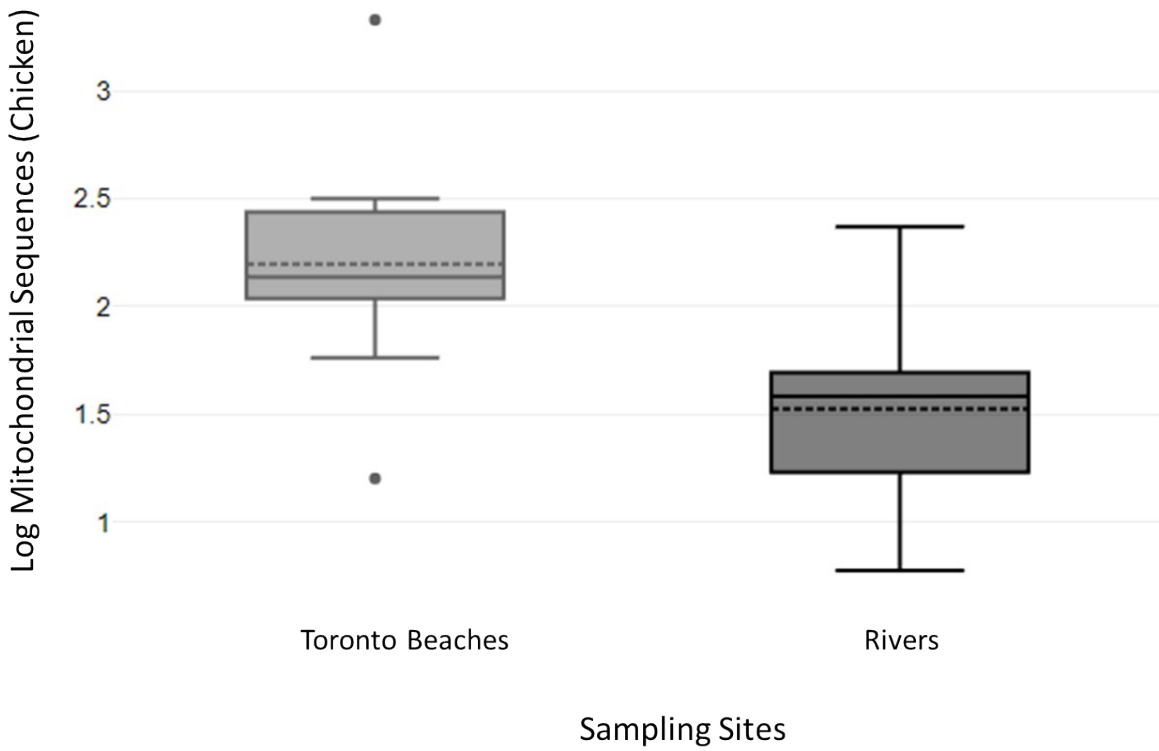

Supplementary Figure 15. Comparative abundance of Chicken mitochondrial sequences between Toronto beaches and river samples.

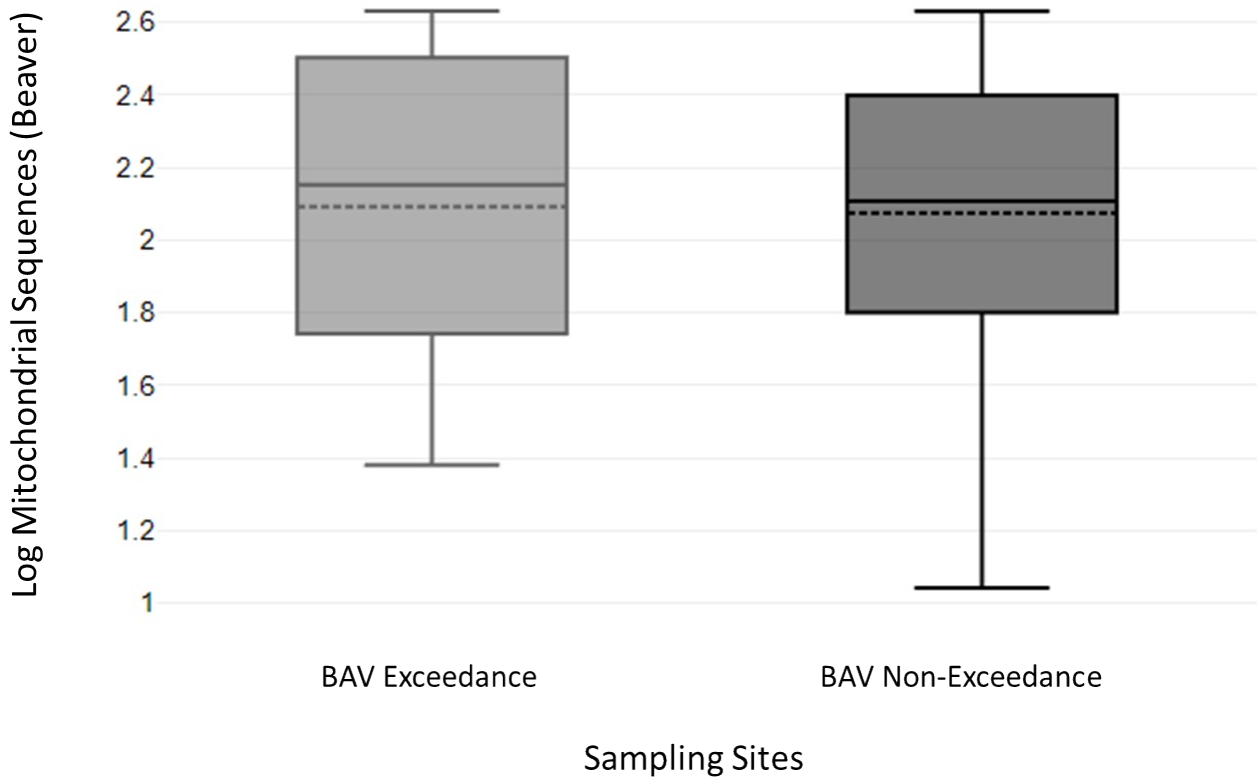

Supplementary Figure 16. Comparative abundance of Beaver mitochondrial sequences between Beach Action Value Exceedance and Non-exceedance Beach water samples.

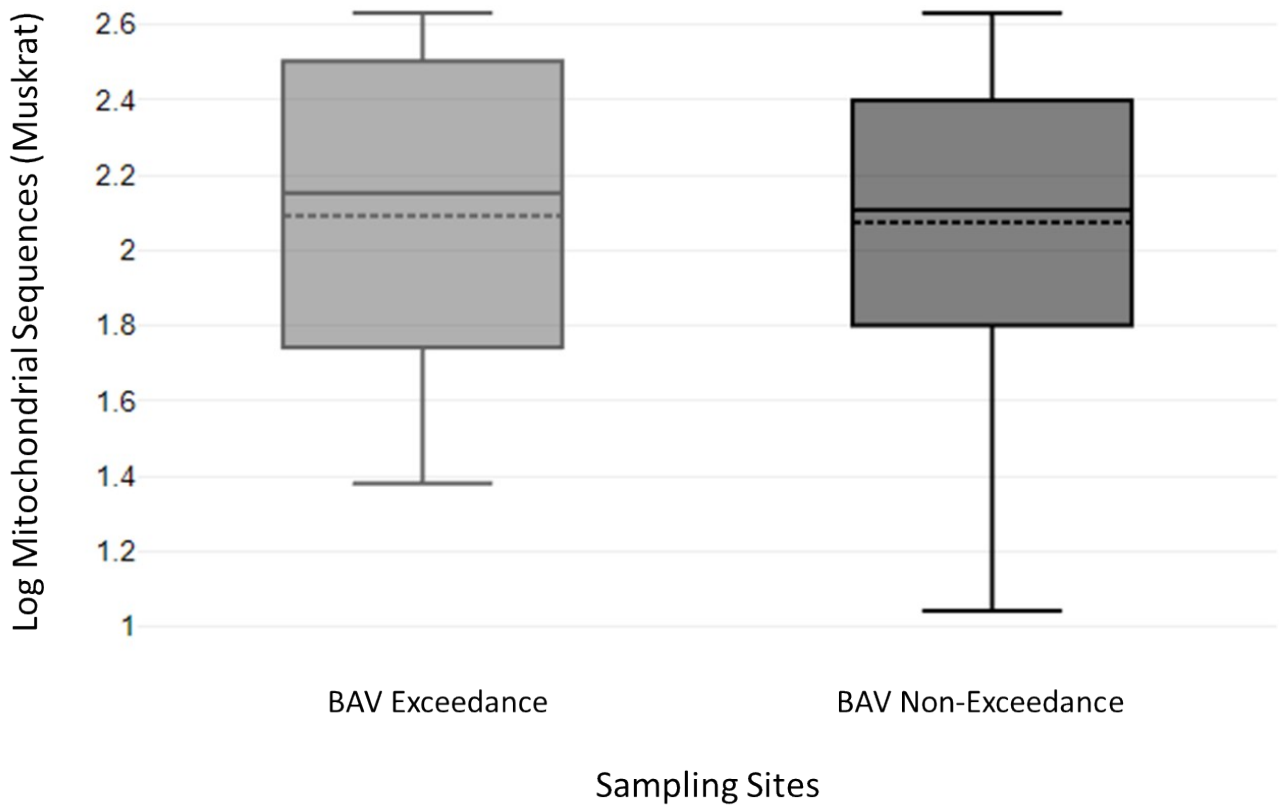

Supplementary Figure 17. Comparative abundance of Muskrat mitochondrial sequences between Beach Action Value Exceedance and Non-exceedance Beach water samples.

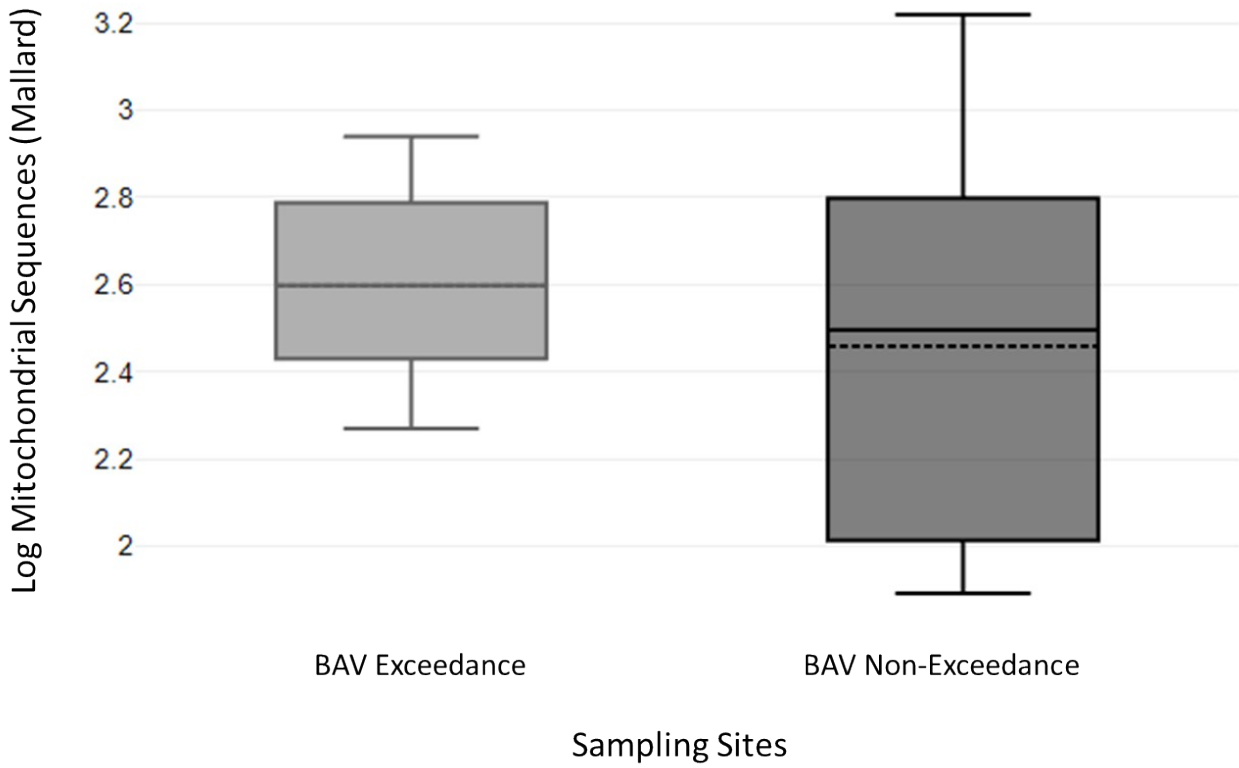

Supplementary Figure 18. Comparative abundance of Mallard mitochondrial sequences between Beach Action Value Exceedance and Non-exceedance Beach water samples.

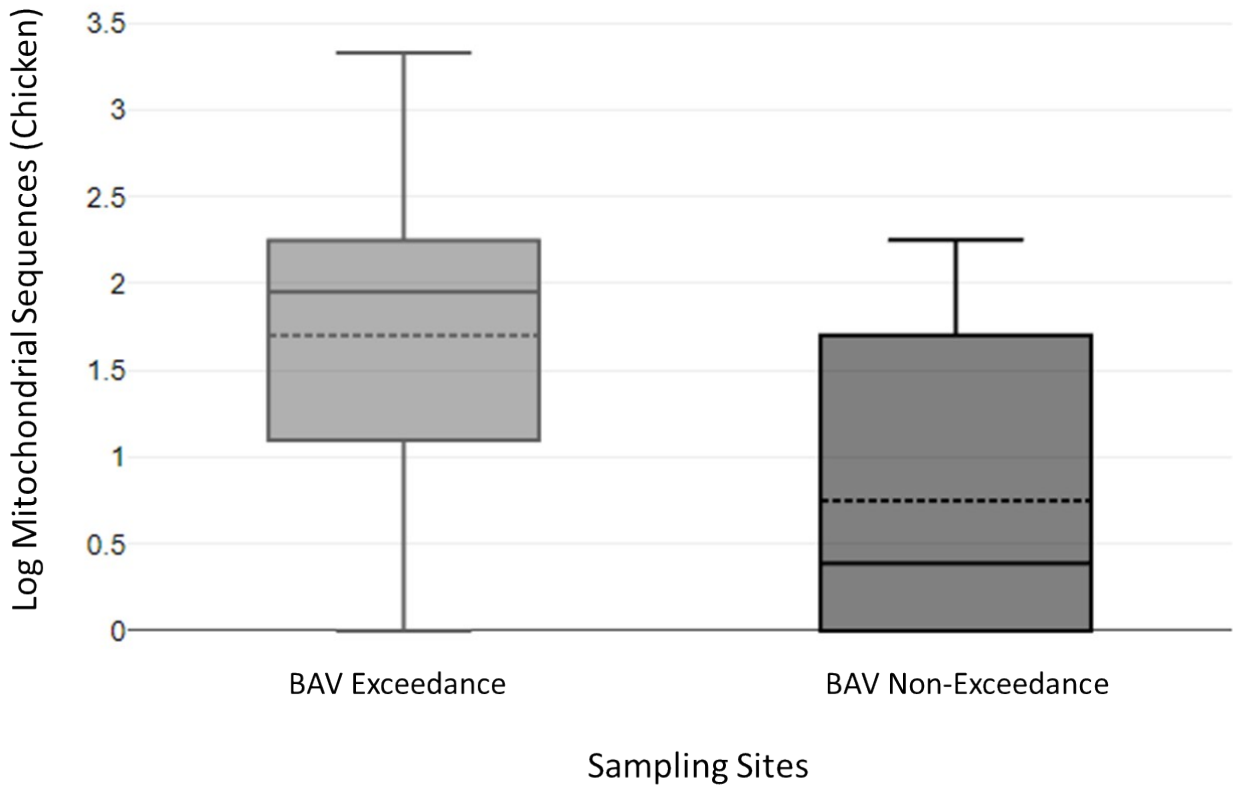

Supplementary Figure 19. Comparative abundance of Chicken mitochondrial sequences between Beach Action Value Exceedance and Non-exceedance Beach water samples.

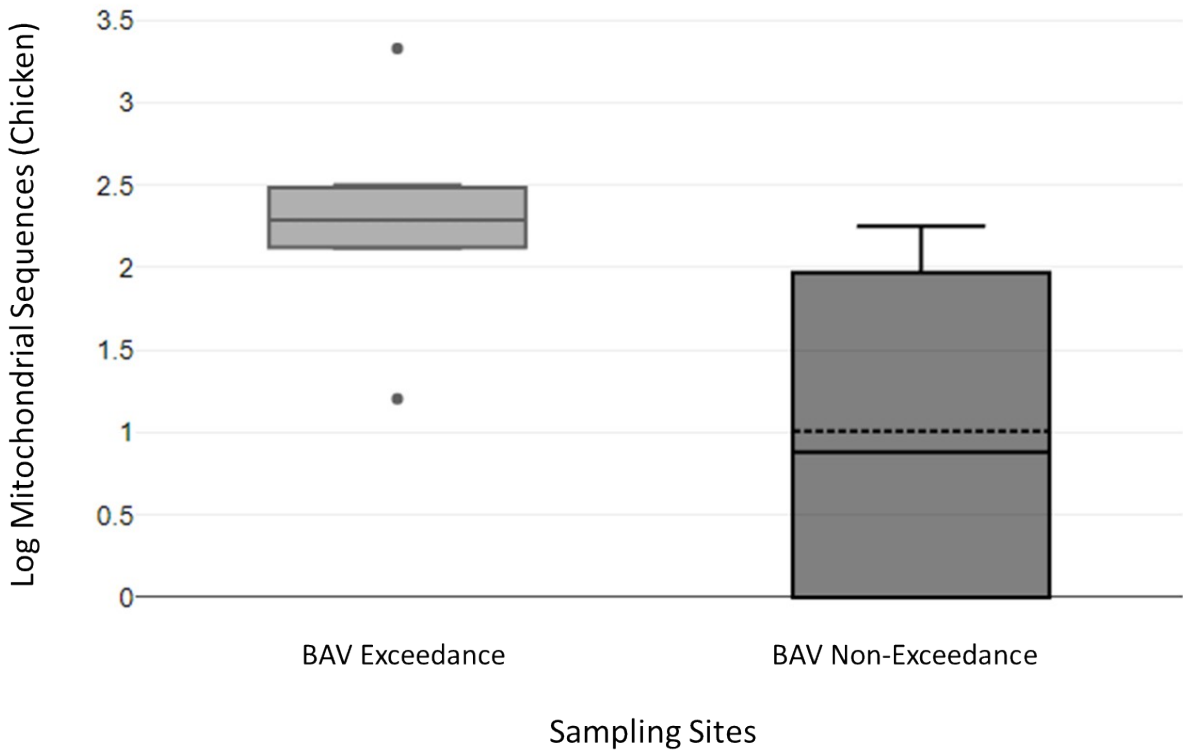

Supplementary Figure 20. Comparative abundance of Chicken mitochondrial sequences between Beach Action Value Exceedance and Non-exceedance shoreline water samples from Toronto beaches.

Supplementary Table 5. Comparison of the frequency of occurrence of food animal eDNA sequences (chicken, cow, pig) with human HF183 and mt dPCR markers and human eDNA sequences.

|                         |                       | <b>HF183 %<br/>+ve</b> | <b>HuMt % +ve</b> | <b>Human eDNA<br/>% +ve</b> |
|-------------------------|-----------------------|------------------------|-------------------|-----------------------------|
| Toronto beaches<br>n=12 | Human eDNA +ve n=12   | 42                     | 92                | 100                         |
|                         | Chicken eDNA +ve n=9  | 56                     | 89                | 100                         |
|                         | Cow eDNA +ve n= 5     | 40                     | 100               | 100                         |
| Niagara beaches<br>n=12 | Human eDNA +ve n=12   | 67                     | 100               | 100                         |
|                         | Chicken eDNA +ve n=9  | 56                     | 100               | 100                         |
|                         | Cow eDNA +ve n= 9     | 78                     | 100               | 100                         |
| Niagara sand<br>n=12    | Human eDNA +ve n=12   | 8                      | 100               | 100                         |
|                         | Chicken eDNA +ve n=9  | 11                     | 100               | 100                         |
|                         | Cow eDNA +ve n= 6     | 17                     | 100               | 100                         |
|                         | Pig eDNA +ve n=2      | 50                     | 100               | 100                         |
| Toronto rivers<br>n=12  | Human eDNA +ve n=12   | 83                     | 67*               | 100                         |
|                         | Chicken eDNA +ve n=10 | 90                     | 71*               | 100                         |
|                         | Cow eDNA +ve n=8      | 100                    | 50*               | 100                         |
|                         | Pig eDNA +ve n=1      | 100                    | 100               | 100                         |
| Total samples           | Human eDNA +ve n=48   | 50                     | 91*               | 100                         |
|                         | Chicken eDNA +ve n=37 | 59                     | 91*               | 100                         |
|                         | Cow eDNA +ve n= 28    | 64                     | 88*               | 100                         |
|                         | Pig eDNA +ve n=3      | 67                     | 100               | 100                         |

\* n=9 rather than 12 due to insufficient amount of DNA for PCR.
