# Supplementary material for: eDNA metabarcoding-based source attribution of fecal indicator bacteria exceedances in urban freshwater beaches, sand and rivers
Source: Royal Society of Chemistry journal article supplement (doi:10.1039/d4va00221k), 2025-01-01
Supplement: d4va00221k2.xlsx [file d4va00221k2.xlsx]

## Sheet: Sheet1
Scientific Name	Common Name	ETOB-July7	ETOB-June10	ETOB-June30	ETOB-August26	ETOB-July28	ETOB-June2	Hum-August25	Hum-June29	Hum-June30	Hum-August5	Hum-July7	Hum-June2	LK-Ex-August4	LK-Ex-August9	LK-Non-ex-August10	LK-Non-ex-August17	LK-Sand-August10	LK-Sand-August4	LK-Sand-June23	LK-Sand-August16	LK-Sand-July8	LK-Sand-June22	MC-Ex-July7	MC-Ex-June10	MC-Ex-June30	MC-Non-ex-August25	MC-Non-ex-July19	MC-Non-ex-June2	SS-Ex-August25	SS-Ex-June29	SS-Ex-June30	SS-Non-ex-August5	SS-Non-ex-July7	SS-Non-ex-June2	Sun-Ex-August11	Sun-Ex-August9	Sun-Ex-July21	Sun-Ex-June7	Sun-Non-Ex-August25	Sun-Non-Ex-July27	Sun-Non-Ex-June8	Sun-Non-ex-August30	Sun-Sand-August9	Sun-Sand-July21	Sun-Sand-June7	Sun-Sand-August16	Sun-Sand-July27	Sun-Sand-June1
Neogobius melanostomus	round goby	35718	53087	60523	37354	55135	49428	43714	44257	45466	38033	46079	45339	38853	23921	38991	34647	35291	32649	39252	35554	39790	40648	35375	52189	29717	43828	36291	42840	30886	46320	43133	53008	53639	46090	39526	37215	41318	36211	30422	31346	26559	40637	27027	36591	45750	24165	27834	43661
Alosa pseudoharengus	alewife	4834	9315	3107	4506	6262	6299	3841	1700	2430	5534	6485	5448	6481	8698	3761	5121	4694	5040	7640	4509	3445	2619	31768	5896	5395	5475	3565	3747	4339	3814	3751	8340	3123	3364	10957	11261	3455	17286	5501	3565	34233	5740	3021	4359	4839	5194	2827	7010
Lepomis cyanellus	green sunfish	4046	2477	844	5029	4208	2285	3279	3146	2344	2179	4510	1802	461	760	838	119	650	1127	266	108	42	154	1894	1739	1364	1618	1162	4097	1734	2437	539	2692	3056	3400	349	575	203	305	842	952	415	425	603	746	625	493	176	273
Rhinichthys cataractae	longnose dace	3733	2612	3187	2260	1682	1437	2535	2301	2256	2531	2640	2105	1684	1983	1688	716	1379	694	132	342	618	315	2068	1078	2416	1602	3688	1628	1043	2516	1863	1625	596	1318	688	780	420	883	1338	1207	962	727	1283	592	974	522	551	1141
Campostoma anomalum	central stoneroller	867	3140	825	391	1037	761	763	1040	254	1383	695	1201	1126	679	462	821	371	268	186	332	418	252	612	394	169	340	1164	1091	1328	1701	464	701	1244	325	562	360	169	452	643	374	345	497	700	235	304	90	353	376
Rhinichthys atratulus	blacknose dace	535	1075	523	1745	282	503	1127	1523	367	537	84	515	638	547	221	195	320	222	170	136	266	256	337	548	657	1233	836	908	678	344	673	650	865	506	399	1	296	531	133	113	50	282	358	194	400	249	446	373
Ambloplites rupestris	rock bass	852	1864	613	1677	638	687	892	1898	298	330	245	371	219	461	368	301	291	299	333	143	160	104	1023	326	702	376	423	439	1370	597	600	718	612	723	209	319	257	269	697	465	159	106	279	339	386	251	115	275
Pimephales notatus	bluntnose minnow	487	779	27	533	182	223	192	553	601	139	767	158	467	353	77	285	153	10	83	0	305	82	311	540	323	87	261	800	654	207	421	639	388	318	398	5	60	85	0	252	160	98	218	10	218	94	44	136
Lepomis gibbosus	pumpkinseed sunfish	743	911	168	286	632	779	467	1217	451	27	377	520	376	206	91	88	141	13	119	0	3	88	281	14	13	418	922	294	465	14	146	800	0	255	163	115	0	2	123	4	323	261	66	94	89	202	111	163
Ameiurus nebulosus	brown bullhead	534	3	116	1355	0	893	208	771	96	674	293	827	146	22	0	2	82	0	213	2	1	91	246	522	199	1	514	203	789	239	848	10	806	443	0	0	1	83	0	0	0	34	4	0	0	35	0	0
Dorosoma cepedianum	American gizzard shad	94	200	301	1903	47	43	802	71	182	760	183	8	4	207	161	319	4	29	78	93	351	171	253	11	280	694	1	97	219	122	651	3	1422	2	127	696	74	72	342	4	98	0	88	220	165	344	87	91
Luxilus chrysocephalus	striped shiner	276	261	438	4	20	84	128	284	168	183	0	164	2	0	0	122	0	95	75	0	137	144	104	0	3	144	1	438	535	125	120	333	330	0	26	373	156	0	197	2	93	8	128	36	240	49	103	160
Catostomus commersonii	white sucker	116	235	209	458	87	535	6	15	278	11	2	201	0	1	159	61	94	69	14	0	0	62	0	63	271	0	384	377	292	79	360	324	82	592	1	110	50	138	73	16	167	0	88	97	150	78	55	0
Cyprinus carpio	common carp	91	2	111	168	136	127	43	7	113	29	190	101	0	0	0	0	0	66	0	66	0	0	740	1	0	0	10	178	160	489	123	227	607	42	0	0	0	42	26	0	0	0	18	0	0	0	0	0
Esox lucius	northern pike	127	0	506	303	224	237	0	278	120	112	157	65	0	1	61	56	49	0	74	6	54	1	144	109	0	360	0	169	20	6	1	0	346	0	79	46	0	2	0	105	62	380	0	0	163	49	0	209
Gasterosteus aculeatus	three-spined stickleback	0	462	99	0	0	171	216	117	84	0	0	115	52	0	159	30	48	0	50	2	0	0	0	106	0	0	18	71	0	40	3	91	26	19	304	0	97	70	98	313	8	48	69	76	0	44	64	59
Semotilus atromaculatus	creek chub	11	451	2	3	4	1	0	141	144	244	21	0	101	0	87	23	154	0	0	49	68	34	0	28	122	0	118	0	0	272	207	236	138	0	0	0	0	46	60	0	0	11	44	112	0	86	0	87
Micropterus dolomieu	smallmouth bass	2	300	6	21	0	172	81	7	107	15	0	23	60	61	1	0	56	1	5	0	1	79	0	269	0	0	0	0	316	89	119	262	301	162	151	0	0	4	0	1	6	158	28	51	113	0	0	0
Pimephales promelas	fathead minnow	23	136	124	8	348	559	0	194	0	1	0	63	0	0	0	0	0	7	85	0	57	3	63	104	55	154	185	404	0	109	108	0	65	0	0	0	63	0	0	90	138	19	97	67	0	65	1	56
Percina caprodes	logperch	3	64	0	0	0	66	105	60	0	123	26	0	0	0	0	0	0	0	2	0	0	0	76	0	0	0	0	55	102	107	0	6	18	0	0	0	0	0	0	0	0	0	0	0	35	0	0	0
Culaea inconstans	brook stickleback	1	9	34	0	0	0	0	0	0	120	0	0	0	0	0	0	0	0	0	51	0	0	0	1	5	120	2	0	141	17	0	169	32	1	0	0	0	4	0	0	0	0	0	48	0	35	0	72
Notropis atherinoides	emerald shiner	0	2	0	0	0	8	0	0	0	0	0	0	2	0	0	0	0	0	0	0	0	4	0	0	0	169	138	0	0	0	0	0	0	0	0	1	1	1	0	3	1	0	0	0	10	0	0	0
Oncorhynchus keta	chum salmon	0	0	0	0	0	0	0	0	0	0	0	0	0	0	0	0	0	0	0	0	0	0	0	105	0	0	176	0	0	0	0	0	0	0	0	0	0	0	0	0	0	0	0	0	0	0	0	0
Osmerus mordax	rainbow smelt	0	0	0	0	0	0	0	0	157	0	0	21	0	0	0	0	0	0	0	0	0	0	0	3	0	0	4	0	0	0	0	0	0	0	0	0	0	0	0	0	0	0	0	0	0	0	0	0
Lepomis macrochirus	bluegill	0	0	0	0	0	0	144	0	2	0	0	0	0	0	0	0	0	0	0	44	0	0	0	0	0	0	0	0	0	0	0	0	0	0	0	0	0	0	0	0	0	0	0	0	0	0	0	0

## Sheet: Samples-Metadata
Sample Id	Location	Groups	Beach Location
ETOB-Ex-July7	Toronto	Etobicoke-Creek	Etobicoke Creek
ETOB-Ex-June10	Toronto	Etobicoke-Creek	Etobicoke Creek
ETOB-June30	Toronto	Etobicoke-Creek	Etobicoke Creek
ETOB-August26	Toronto	Etobicoke-Creek	Etobicoke Creek
ETOB-July28	Toronto	Etobicoke-Creek	Etobicoke Creek
ETOB-June2	Toronto	Etobicoke-Creek	Etobicoke Creek
Hum-August25	Toronto	Humber-River	Humber River
Hum-June29	Toronto	Humber-River	Humber River
Hum-June30	Toronto	Humber-River	Humber River
Hum-August5	Toronto	Humber-River	Humber River
Hum-July7	Toronto	Humber-River	Humber River
Hum-June2	Toronto	Humber-River	Humber River
LK-Ex-August4	Niagara	Lakeside-Beach-BAV-Exceedance	Lakeside Beach
LK-Ex-August9	Niagara	Lakeside-Beach-BAV-Exceedance	Lakeside Beach
LK-Non-ex-August10	Niagara	Lakeside-Beach-BAV-Non-Exceedance	Lakeside Beach
LK-Non-ex-August17	Niagara	Lakeside-Beach-BAV-Non-Exceedance	Lakeside Beach
LK-Sand-August10	Niagara	Lakeside-Sand	Lakeside Beach Sand
LK-Sand-August4	Niagara	Lakeside-Sand	Lakeside Beach Sand
LK-Sand-June23	Niagara	Lakeside-Sand	Lakeside Beach Sand
LK-Sand-August16	Niagara	Lakeside-Sand	Lakeside Beach Sand
LK-Sand-July8	Niagara	Lakeside-Sand	Lakeside Beach Sand
LK-Sand-June22	Niagara	Lakeside-Sand	Lakeside Beach Sand
MC-Ex-July7	Toronto	Marie-Curtis-Park-East-BAV-Exceedance	Marie Curtis Park East Beach
MC-Ex-June10	Toronto	Marie-Curtis-Park-East-BAV-Exceedance	Marie Curtis Park East Beach
MC-Ex-June30	Toronto	Marie-Curtis-Park-East-BAV-Exceedance	Marie Curtis Park East Beach
MC-Non-ex-August25	Toronto	Marie-Curtis-Park-East-BAV-Non-Exceedance	Marie Curtis Park East Beach
MC-Non-ex-July19	Toronto	Marie-Curtis-Park-East-BAV-Non-Exceedance	Marie Curtis Park East Beach
MC-Non-ex-June2	Toronto	Marie-Curtis-Park-East-BAV-Non-Exceedance	Marie Curtis Park East Beach
SS-Ex-August25	Toronto	Sunnyside-Beach-BAV-Exceedance	Sunnyside Beach
SS-Ex-June29	Toronto	Sunnyside-Beach-BAV-Exceedance	Sunnyside Beach
SS-Ex-June30	Toronto	Sunnyside-Beach-BAV-Exceedance	Sunnyside Beach
SS-Non-ex-August5	Toronto	Sunnyside-Beach-BAV-Non-Exceedance	Sunnyside Beach
SS-Non-ex-July7	Toronto	Sunnyside-Beach-BAV-Non-Exceedance	Sunnyside Beach
SS-Non-ex-June2	Toronto	Sunnyside-Beach-BAV-Non-Exceedance	Sunnyside Beach
Sun-Ex-August11	Niagara	Sunset-Beach-BAV-Exceedance	Sunset Beach
Sun-Ex-August9	Niagara	Sunset-Beach-BAV-Exceedance	Sunset Beach
Sun-Ex-July21	Niagara	Sunset-Beach-BAV-Exceedance	Sunset Beach
Sun-Ex-June7	Niagara	Sunset-Beach-BAV-Exceedance	Sunset Beach
Sun-Non-Ex-August25	Niagara	Sunset-Beach-BAV-Non-Exceedance	Sunset Beach
Sun-Non-Ex-July27	Niagara	Sunset-Beach-BAV-Non-Exceedance	Sunset Beach
Sun-Non-Ex-June8	Niagara	Sunset-Beach-BAV-Non-Exceedance	Sunset Beach
Sun-Non-ex-August30	Niagara	Sunset-Beach-BAV-Non-Exceedance	Sunset Beach
Sun-Sand-August9	Niagara	Sunset-Sand	Sunset Beach Sand
Sun-Sand-July21	Niagara	Sunset-Sand	Sunset Beach Sand
Sun-Sand-June7	Niagara	Sunset-Sand	Sunset Beach Sand
Sun-Sand-August16	Niagara	Sunset-Sand	Sunset Beach Sand
Sun-Sand-July27	Niagara	Sunset-Sand	Sunset Beach Sand
Sun-Sand-June1	Niagara	Sunset-Sand	Sunset Beach Sand
