# Supplementary material for: eDNA metabarcoding-based source attribution of fecal indicator bacteria exceedances in urban freshwater beaches, sand and rivers
Source: Royal Society of Chemistry journal article supplement (doi:10.1039/d4va00221k), 2025-01-01
Supplement: d4va00221k3.xlsx [file d4va00221k3.xlsx]

## Sheet: Sheet1
Common_Name		ETOB-July7	ETOB-June10	ETOB-June30	ETOB-August26	ETOB-July28	ETOB-June2	Hum-August25	Hum-June29	Hum-June30	Hum-August5	Hum-July7	Hum-June2	LK-Ex-August4	LK-Ex-August9	LK-Non-ex-August10	LK-Non-ex-August17	LK-Sand-August10	LK-Sand-August4	LK-Sand-June23	LK-Sand-August16	LK-Sand-July8	LK-Sand-June22	MC-Ex-July7	MC-Ex-June10	MC-Ex-June30	MC-Non-ex-August25	MC-Non-ex-July19	MC-Non-ex-June2	SS-Ex-August25	SS-Ex-June29	SS-Ex-June30	SS-Non-ex-August5	SS-Non-ex-July7	SS-Non-ex-June2	Sun-Ex-August11	Sun-Ex-August9	Sun-Ex-July21	Sun-Ex-June7	Sun-Non-Ex-August25	Sun-Non-Ex-July27	Sun-Non-Ex-June8	Sun-Non-ex-August30	Sun-Sand-August9	Sun-Sand-July21	Sun-Sand-June7	Sun-Sand-August16	Sun-Sand-July27	Sun-Sand-June1
human	Mammal	41012	35925	25645	30642	28682	31530	33171	30196	39359	37854	30366	22482	26885	29257	27433	24577	26030	27941	30055	24504	25712	37792	19410	33698	31582	24476	32617	26420	20023	28341	27189	28772	31861	33343	32170	32618	23371	23966	29509	28790	18813	30076	23418	24682	38150	28038	19704	25912
American beaver	Mammal	208	482	290	779	230	302	264	789	384	881	483	653	24	102	66	55	12	110	3	68	17	58	386	382	427	234	236	426	78	299	197	84	420	297	63	34	37	223	131	125	48	11	33	77	71	0	22	175
muskrat	Mammal	103	1666	77	1896	178	1603	678	2415	975	2223	200	326	88	169	210	3	277	281	6	0	171	143	2	477	629	123	1289	1857	394	1646	422	895	166	881	206	330	113	244	207	226	98	10	448	98	215	124	286	42
mallard	Bird	306	492	290	621	826	583	717	1213	363	427	456	535	396	613	2	79	20	221	189	104	2	180	186	579	328	649	311	794	870	631	189	568	316	1654	269	11	46	1	1	93	78	141	79	124	8	118	159	156
European herring gull	Bird	506	314	643	36	273	1034	0	49	41	465	175	207	70	81	1	609	123	58	17	37	97	3	168	0	245	589	47	526	0	390	372	175	967	1989	2	240	227	9	13	267	125	86	0	116	372	37	4	273
raccoon	Mammal	126	677	225	421	162	159	53	80	594	186	0	116	118	53	159	128	6	337	0	165	103	48	534	333	97	386	0	214	223	1825	9	143	173	78	0	191	148	4	437	306	196	205	165	228	0	0	45	61
chicken	Bird	41	48	31	0	14	94	50	6	9	36	0	234	2	6	3	0	126	9	1	52	89	48	274	137	316	178	0	0	131	16	2127	58	0	109	61	153	0	44	0	3	48	2	0	116	16	0	0	2
American robin	Bird	16	701	0	178	166	173	670	0	163	463	5	92	472	23	71	14	99	77	253	51	44	56	13	0	1	56	0	132	49	142	0	0	102	462	8	1	401	209	211	160	0	158	1	57	1	271	60	230
cattle	Mammal	60	25	82	0	397	0	240	1	3	6	0	0	0	508	0	0	1	94	118	0	0	0	0	5	0	156	0	125	0	0	228	391	0	0	190	2	32	2	228	3	65	1	6	0	139	0	0	3
red fox	Mammal	112	315	0	0	0	32	0	2	0	2	146	241	1	92	0	0	0	35	0	0	52	17	67	194	2	105	17	0	219	129	0	0	1	51	0	54	67	32	0	0	44	0	127	0	35	225	27	0
red-winged blackbird	Bird	113	46	0	38	114	0	0	0	15	267	0	341	114	0	0	0	0	0	3	0	0	0	168	0	0	0	0	0	1	240	0	210	0	93	0	0	1	141	1	0	0	0	0	33	52	0	0	0
gray squirrel	Mammal	4	27	26	0	341	77	254	199	124	0	86	0	0	0	0	0	0	0	0	0	77	1	1	0	0	141	0	121	0	0	0	0	0	0	0	0	51	0	0	0	0	0	57	55	0	78	0	0
mute swan	Bird	0	0	104	0	0	0	0	0	0	483	152	0	53	0	0	0	0	0	0	0	0	0	0	0	0	288	0	0	12	14	6	493	0	10	0	0	0	0	0	0	0	0	58	0	0	0	40	0
domestic cat	Mammal	0	0	0	0	0	354	93	0	0	0	0	0	0	0	0	0	0	0	0	0	0	0	0	0	0	0	0	0	217	1	5	0	0	0	0	0	0	0	0	0	0	0	0	0	0	0	0	0
northern house-martin	Bird	42	19	0	1	0	231	0	0	313	44	0	0	0	0	0	0	0	0	0	0	0	0	0	0	72	0	0	0	0	0	0	0	0	0	0	0	0	0	0	0	0	0	0	0	0	0	0	0
dog	Mammal	0	0	0	2	50	0	118	133	13	0	118	99	2	0	0	0	0	0	5	0	0	0	10	0	3	86	0	0	5	192	97	0	104	4	0	13	0	0	0	0	0	0	0	0	0	0	0	0
Canada goose	Bird	0	0	0	0	0	0	0	179	7	0	0	4	0	0	32	0	0	0	0	0	0	0	0	17	134	42	0	32	51	0	107	11	1	281	0	0	0	0	0	0	0	0	0	0	0	0	0	0
common starling	Bird	12	102	0	0	0	0	0	0	0	0	0	0	0	92	0	0	0	0	0	0	0	0	0	0	4	0	0	0	0	0	0	0	35	37	0	0	0	0	0	0	0	73	0	15	0	0	0	0
double-crested cormorant	Bird	0	0	0	0	0	0	33	17	0	104	0	0	0	0	0	0	0	0	2	0	0	0	0	0	0	0	0	0	0	0	0	0	0	11	0	0	0	0	0	0	0	0	0	0	91	0	0	0
North American opossum	Mammal	0	2	0	0	0	0	0	19	0	0	1	90	0	0	0	12	0	20	0	0	0	0	0	0	0	36	0	0	0	0	0	0	0	0	0	0	1	0	34	23	0	0	0	11	0	0	0	16
rock pigeon	Bird	0	0	0	0	0	0	0	0	8	0	158	0	0	0	0	0	0	0	0	0	0	0	0	0	0	22	0	0	0	0	0	0	0	0	0	0	0	0	0	0	0	0	0	0	0	0	0	0
killdeer	Bird	0	0	1	0	0	0	0	0	0	0	151	0	0	0	0	0	0	0	0	0	0	0	0	0	0	0	0	0	0	0	0	0	0	0	0	0	0	0	0	0	0	0	0	0	0	0	0	0
montane vole	Mammal	5	9	0	11	4	4	40	0	0	0	0	0	0	0	0	0	0	0	0	0	0	0	20	0	4	0	0	0	0	0	0	0	0	0	0	0	0	0	0	0	0	0	0	0	0	0	0	0
Eurasian tree sparrow	Bird	2	0	0	0	21	0	0	0	0	0	0	0	0	0	0	0	0	0	0	0	0	0	0	0	0	0	0	0	0	0	0	0	0	0	0	0	0	6	0	0	0	0	0	0	0	0	0	0

## Sheet: Samples-Metadata
Sample Id	Location	Groups	Beach Location
ETOB-Ex-July7	Toronto	Etobicoke-Creek	Etobicoke Creek
ETOB-Ex-June10	Toronto	Etobicoke-Creek	Etobicoke Creek
ETOB-June30	Toronto	Etobicoke-Creek	Etobicoke Creek
ETOB-August26	Toronto	Etobicoke-Creek	Etobicoke Creek
ETOB-July28	Toronto	Etobicoke-Creek	Etobicoke Creek
ETOB-June2	Toronto	Etobicoke-Creek	Etobicoke Creek
Hum-August25	Toronto	Humber-River	Humber River
Hum-June29	Toronto	Humber-River	Humber River
Hum-June30	Toronto	Humber-River	Humber River
Hum-August5	Toronto	Humber-River	Humber River
Hum-July7	Toronto	Humber-River	Humber River
Hum-June2	Toronto	Humber-River	Humber River
LK-Ex-August4	Niagara	Lakeside-Beach-BAV-Exceedance	Lakeside Beach
LK-Ex-August9	Niagara	Lakeside-Beach-BAV-Exceedance	Lakeside Beach
LK-Non-ex-August10	Niagara	Lakeside-Beach-BAV-Non-Exceedance	Lakeside Beach
LK-Non-ex-August17	Niagara	Lakeside-Beach-BAV-Non-Exceedance	Lakeside Beach
LK-Sand-August10	Niagara	Lakeside-Sand	Lakeside Beach Sand
LK-Sand-August4	Niagara	Lakeside-Sand	Lakeside Beach Sand
LK-Sand-June23	Niagara	Lakeside-Sand	Lakeside Beach Sand
LK-Sand-August16	Niagara	Lakeside-Sand	Lakeside Beach Sand
LK-Sand-July8	Niagara	Lakeside-Sand	Lakeside Beach Sand
LK-Sand-June22	Niagara	Lakeside-Sand	Lakeside Beach Sand
MC-Ex-July7	Toronto	Marie-Curtis-Park-East-BAV-Exceedance	Marie Curtis Park East Beach
MC-Ex-June10	Toronto	Marie-Curtis-Park-East-BAV-Exceedance	Marie Curtis Park East Beach
MC-Ex-June30	Toronto	Marie-Curtis-Park-East-BAV-Exceedance	Marie Curtis Park East Beach
MC-Non-ex-August25	Toronto	Marie-Curtis-Park-East-BAV-Non-Exceedance	Marie Curtis Park East Beach
MC-Non-ex-July19	Toronto	Marie-Curtis-Park-East-BAV-Non-Exceedance	Marie Curtis Park East Beach
MC-Non-ex-June2	Toronto	Marie-Curtis-Park-East-BAV-Non-Exceedance	Marie Curtis Park East Beach
SS-Ex-August25	Toronto	Sunnyside-Beach-BAV-Exceedance	Sunnyside Beach
SS-Ex-June29	Toronto	Sunnyside-Beach-BAV-Exceedance	Sunnyside Beach
SS-Ex-June30	Toronto	Sunnyside-Beach-BAV-Exceedance	Sunnyside Beach
SS-Non-ex-August5	Toronto	Sunnyside-Beach-BAV-Non-Exceedance	Sunnyside Beach
SS-Non-ex-July7	Toronto	Sunnyside-Beach-BAV-Non-Exceedance	Sunnyside Beach
SS-Non-ex-June2	Toronto	Sunnyside-Beach-BAV-Non-Exceedance	Sunnyside Beach
Sun-Ex-August11	Niagara	Sunset-Beach-BAV-Exceedance	Sunset Beach
Sun-Ex-August9	Niagara	Sunset-Beach-BAV-Exceedance	Sunset Beach
Sun-Ex-July21	Niagara	Sunset-Beach-BAV-Exceedance	Sunset Beach
Sun-Ex-June7	Niagara	Sunset-Beach-BAV-Exceedance	Sunset Beach
Sun-Non-Ex-August25	Niagara	Sunset-Beach-BAV-Non-Exceedance	Sunset Beach
Sun-Non-Ex-July27	Niagara	Sunset-Beach-BAV-Non-Exceedance	Sunset Beach
Sun-Non-Ex-June8	Niagara	Sunset-Beach-BAV-Non-Exceedance	Sunset Beach
Sun-Non-ex-August30	Niagara	Sunset-Beach-BAV-Non-Exceedance	Sunset Beach
Sun-Sand-August9	Niagara	Sunset-Sand	Sunset Beach Sand
Sun-Sand-July21	Niagara	Sunset-Sand	Sunset Beach Sand
Sun-Sand-June7	Niagara	Sunset-Sand	Sunset Beach Sand
Sun-Sand-August16	Niagara	Sunset-Sand	Sunset Beach Sand
Sun-Sand-July27	Niagara	Sunset-Sand	Sunset Beach Sand
Sun-Sand-June1	Niagara	Sunset-Sand	Sunset Beach Sand
